# Supplementary material
Source: Springer Nature journal article supplement (https://www.springermedizin.de/resource/supplementary/12888_2013_1642_MOESM2_ESM.pdf/9481064)
Supplement: MOESM2 [file 9481064]

**Table 2: Participant characteristics, diagnosis, and tobacco consumption patterns (n=12)**

| Name <sup>a</sup> | SC <sup>b</sup> | Age | Cigarettes per day at time of interview | Nicotine dependence <sup>c</sup> | ADHD subtype          | ICD 10 comorbidity         | Use of other substances | Current medication          | Previous phases of nicotine abstinence |
|-------------------|-----------------|-----|-----------------------------------------|----------------------------------|-----------------------|----------------------------|-------------------------|-----------------------------|----------------------------------------|
| Mr. A.            | yes             | 53  | 2 - 3                                   | very low                         | combined              | -                          | -                       | stimulants                  | 1 month (1993)                         |
| Mr. B.            | yes             | 42  | 3 – 5 / week                            | very low                         | inattentive           | F33.4                      | -                       | stimulants, antidepressants | 7 years (starting 1996)                |
| Mrs. C.           | yes             | 25  | 20                                      | low                              | combined              | F12.24                     | cannabis                | stimulants, antidepressants | 15 months (2002)                       |
| Mrs. D.           | yes             | 46  | 20                                      | high                             | combined              | F10.25<br>F11.20<br>F14.20 | alcohol                 | stimulants, antidepressants | 6 months (1993)                        |
| Mrs. E.           | yes             | 27  | 20                                      | very high                        | combined              | -                          | -                       | stimulants                  | 4 – 5 years (2000)                     |
| Mrs. F.           | yes             | 47  | 23                                      | very high                        | combined              | F43.21                     | -                       | stimulants, antidepressants | 3 weeks (1994)                         |
| Mrs. G.           | yes             | 42  | 30                                      | moderate                         | combined              | F43.21                     | -                       | Antidepressants             | One year (2001)                        |
| Mrs. H.           | no              | 26  | 35                                      | high                             | combined              | F43.21                     | -                       | stimulants, antidepressants | 18 months (2003)                       |
| Mr. I.            | no              | 47  | 35                                      | high                             | hyperactive/impulsive | F12.24<br>F60.2            | cannabis                | stimulants                  | 1 month (2003)                         |
| Mrs. J.           | yes             | 44  | 30                                      | very high                        | combined              | F11.202<br>F41.2           | alcohol                 | stimulants                  | 6 months (1984)                        |
| Mr. K.            | no              | 46  | 33                                      | very high                        | combined              | F10.24<br>F33.4            | alcohol                 | stimulants                  | 1 month (1992)                         |
| Mr. L.            | no              | 32  | 35                                      | very high                        | combined              | F10.25<br>F14.20           | alcohol                 | stimulants                  | none                                   |

<sup>a</sup> pseudonym

<sup>b</sup> participated in smoking cessation treatment

<sup>c</sup> nicotine dependence according to Fagerström
